# Supplementary material for: Crystal structure of natural product argyrin-D determined by 3D electron diffraction
Source: Royal Society of Chemistry journal article supplement (doi:10.1039/d2ce00707j), 2022-01-01
Supplement: d2ce00707j1.pdf [file d2ce00707j1.pdf]

**Supplementary Movie 1:**

Additionally to SHELX refinement, the model was refined in Phenix at a resolution of 1.1Å using implemented electron scattering factors and restraints to R and  $R_{\text{free}}$  values of 17.3 and 18.6%, respectively.

360° rotation of the Argyrin D model (stick mode with carbon, yellow; nitrogen, blue; oxygen, red; sulfur, gold and hydrogen, white) defined by a 2Fo-Fc map contoured at 1.2 sigma (grey mesh) can be viewed at

DOI:10.5281/zenodo.6817935
